# Supplementary material
Source: PubMed Central journal article supplement (PMC6869380)
Supplement: HBM-36-4938-s001.pdf [file HBM-36-4938-s001.pdf]

**Supporting Information Table I. FA-weighted local efficiency and the broad heritability of local efficiency at measurement 1 (M1) and measurement 2 (M2).**

| Region             | Local efficiency |        |       |        | Broad heritability of local efficiency |             |             |             |
|--------------------|------------------|--------|-------|--------|----------------------------------------|-------------|-------------|-------------|
|                    | Left             |        | Right |        | Left                                   |             | Right       |             |
|                    | M 1              | M 2    | M 1   | M 2    | M 1                                    | M 2         | M 1         | M 2         |
| Precentral         | 0.41             | 0.42** | 0.40  | 0.42** | <b>0.43</b>                            | <b>0.24</b> | <b>0.44</b> | <b>0.48</b> |
| Frontal_Sup        | 0.43             | 0.44** | 0.42  | 0.43** | <b>0.25</b>                            | <b>0.39</b> | 0.26        | <b>0.29</b> |
| Frontal_Sup_Orb    | 0.41             | 0.42** | 0.42  | 0.42*  | 0.25                                   | <b>0.41</b> | 0.03        | 0.22        |
| Frontal_Mid        | 0.41             | 0.42** | 0.38  | 0.39** | <b>0.52</b>                            | <b>0.37</b> | <b>0.38</b> | <b>0.25</b> |
| Frontal_Mid_Orb    | 0.39             | 0.41** | 0.38  | 0.39** | 0.23                                   | 0.16        | 0.01        | 0.08        |
| Frontal_Inf_Oper   | 0.40             | 0.42** | 0.37  | 0.39** | <b>0.64</b>                            | <b>0.38</b> | 0.31        | <b>0.33</b> |
| Frontal_Inf_Tri    | 0.40             | 0.41** | 0.38  | 0.39** | 0.14                                   | 0.20        | <b>0.23</b> | <b>0.34</b> |
| Frontal_Inf_Orb    | 0.38             | 0.39** | 0.37  | 0.37*  | 0.04                                   | 0.20        | 0.06        | 0.16        |
| Rolandic_Oper      | 0.39             | 0.41** | 0.36  | 0.38** | <b>0.74</b>                            | <b>0.32</b> | <b>0.35</b> | <b>0.49</b> |
| Supp_Motor_Area    | 0.46             | 0.47** | 0.45  | 0.46** | <b>0.59</b>                            | <b>0.47</b> | <b>0.45</b> | <b>0.45</b> |
| Olfactory          | 0.39             | 0.39   | 0.39  | 0.38** | 0.17                                   | <b>0.37</b> | 0.03        | <b>0.29</b> |
| Frontal_Sup_Media  | 0.47             | 0.48*  | 0.46  | 0.46*  | 0.43                                   | 0.16        | 0.06        | 0.19        |
| Frontal_Med_Orb    | 0.48             | 0.48   | 0.47  | 0.47   | 0.22                                   | <b>0.26</b> | 0.13        | 0.16        |
| Rectus             | 0.41             | 0.41   | 0.42  | 0.41   | 0.09                                   | 0.20        | 0.33        | 0.31        |
| Insula             | 0.38             | 0.40** | 0.37  | 0.39** | <b>0.46</b>                            | <b>0.40</b> | <b>0.30</b> | <b>0.38</b> |
| Cingulum_Ant       | 0.47             | 0.48   | 0.48  | 0.48   | 0.27                                   | 0.18        | 0.27        | <b>0.30</b> |
| Cingulum_Mid       | 0.45             | 0.46** | 0.45  | 0.46** | <b>0.58</b>                            | <b>0.45</b> | <b>0.38</b> | <b>0.29</b> |
| Cingulum_Post      | 0.47             | 0.50** | 0.48  | 0.50** | <b>0.39</b>                            | <b>0.30</b> | <b>0.23</b> | <b>0.46</b> |
| Hippocampus        | 0.39             | 0.41** | 0.41  | 0.42** | <b>0.37</b>                            | <b>0.42</b> | <b>0.19</b> | <b>0.47</b> |
| ParaHippocampal    | 0.35             | 0.36** | 0.36  | 0.37** | 0.39                                   | <b>0.40</b> | <b>0.21</b> | <b>0.57</b> |
| Amygdala           | 0.36             | 0.37** | 0.36  | 0.37** | <b>0.54</b>                            | <b>0.47</b> | <b>0.38</b> | <b>0.33</b> |
| Calcarine          | 0.46             | 0.49** | 0.46  | 0.49** | <b>0.53</b>                            | <b>0.50</b> | 0.23        | 0.20        |
| Cuneus             | 0.48             | 0.51** | 0.47  | 0.49** | <b>0.46</b>                            | <b>0.35</b> | 0.27        | <b>0.33</b> |
| Lingual            | 0.43             | 0.45** | 0.43  | 0.45** | <b>0.46</b>                            | <b>0.48</b> | <b>0.30</b> | <b>0.26</b> |
| Occipital_Sup      | 0.46             | 0.49** | 0.45  | 0.48** | <b>0.34</b>                            | <b>0.37</b> | 0.26        | 0.14        |
| Occipital_Mid      | 0.43             | 0.46** | 0.41  | 0.43** | 0.26                                   | 0.35        | <b>0.36</b> | 0.21        |
| Occipital_Inf      | 0.42             | 0.45** | 0.43  | 0.45** | 0.20                                   | <b>0.31</b> | 0.09        | 0.27        |
| Fusiform           | 0.38             | 0.40** | 0.39  | 0.41** | <b>0.34</b>                            | <b>0.31</b> | <b>0.39</b> | <b>0.43</b> |
| Postcentral        | 0.39             | 0.41** | 0.40  | 0.42** | <b>0.22</b>                            | <b>0.43</b> | <b>0.44</b> | <b>0.34</b> |
| Parietal_Sup       | 0.42             | 0.45** | 0.42  | 0.43** | <b>0.48</b>                            | <b>0.43</b> | <b>0.42</b> | <b>0.47</b> |
| Parietal_Inf       | 0.39             | 0.41** | 0.40  | 0.41** | <b>0.56</b>                            | <b>0.22</b> | <b>0.35</b> | <b>0.35</b> |
| SupraMarginal      | 0.38             | 0.41** | 0.38  | 0.40** | <b>0.25</b>                            | <b>0.35</b> | <b>0.53</b> | <b>0.50</b> |
| Angular            | 0.38             | 0.41** | 0.39  | 0.41** | <b>0.33</b>                            | <b>0.46</b> | <b>0.37</b> | <b>0.34</b> |
| Precuneus          | 0.43             | 0.46** | 0.45  | 0.47** | <b>0.40</b>                            | <b>0.41</b> | <b>0.50</b> | <b>0.49</b> |
| Paracentral_Lobule | 0.44             | 0.46** | 0.45  | 0.47** | 0.31                                   | 0.26        | 0.24        | <b>0.33</b> |
| Caudate            | 0.39             | 0.39   | 0.39  | 0.39   | <b>0.32</b>                            | <b>0.31</b> | <b>0.30</b> | <b>0.45</b> |
| Putamen            | 0.40             | 0.41** | 0.39  | 0.40** | <b>0.32</b>                            | <b>0.27</b> | <b>0.22</b> | <b>0.33</b> |
| Pallidum           | 0.41             | 0.43** | 0.41  | 0.42** | <b>0.31</b>                            | 0.14        | <b>0.28</b> | 0.19        |
| Thalamus           | 0.41             | 0.42** | 0.41  | 0.42** | <b>0.46</b>                            | <b>0.36</b> | 0.32        | 0.34        |
| Heschl             | 0.39             | 0.41** | 0.37  | 0.40** | <b>0.67</b>                            | <b>0.29</b> | <b>0.45</b> | <b>0.45</b> |
| Temporal_Sup       | 0.40             | 0.42** | 0.38  | 0.40** | 0.28                                   | <b>0.33</b> | 0.13        | <b>0.38</b> |
| Temporal_Pole_Sup  | 0.37             | 0.38** | 0.35  | 0.37** | <b>0.70</b>                            | <b>0.31</b> | <b>0.35</b> | <b>0.32</b> |
| Temporal_Mid       | 0.39             | 0.41** | 0.39  | 0.41** | 0.23                                   | 0.28        | <b>0.26</b> | <b>0.46</b> |
| Temporal_Pole_Mid  | 0.38             | 0.39** | 0.37  | 0.39** | <b>0.62</b>                            | <b>0.54</b> | <b>0.35</b> | <b>0.58</b> |
| Temporal_Inf       | 0.39             | 0.40** | 0.39  | 0.40** | <b>0.43</b>                            | <b>0.24</b> | <b>0.44</b> | <b>0.48</b> |

\* significant change over time ( $P < 0.05$ )

\*\* significant change over time ( $P < 0.05/90$ )

Bold: significant broad heritability ( $P < 0.05$ )

**Supporting Information Table II. Streamline based efficiency at measurement 1 and 2**

| Region <sup>seffect</sup>       | Left |       | Right |        |
|---------------------------------|------|-------|-------|--------|
|                                 | M 1  | M 2   | M 1   | M 2    |
| Precentral <sup>R</sup>         | 840  | 692** | 788   | 717**  |
| Frontal_Sup <sup>L</sup>        | 867  | 830   | 788   | 778    |
| Frontal_Sup_Orb                 | 301  | 355** | 334   | 398**  |
| Frontal_Mid <sup>LR</sup>       | 514  | 503   | 402   | 410    |
| Frontal_Mid_Orb <sup>R</sup>    | 283  | 346** | 266   | 293    |
| Frontal_Inf_Oper <sup>LR</sup>  | 506  | 482*  | 467   | 417**  |
| Frontal_Inf_Tri <sup>LR</sup>   | 469  | 443*  | 422   | 419*   |
| Frontal_Inf_Orb <sup>LR</sup>   | 275  | 268   | 285   | 249*   |
| Rolandic_Oper <sup>LR</sup>     | 403  | 394*  | 324   | 287    |
| Supp_Motor_Area                 | 1088 | 962** | 1024  | 868**  |
| Olfactory <sup>LR</sup>         | 178  | 166   | 175   | 142**  |
| Frontal_Sup_Medial <sup>L</sup> | 810  | 793   | 679   | 703    |
| Frontal_Med_Orb                 | 322  | 328   | 384   | 414    |
| Rectus                          | 183  | 168   | 194   | 165**  |
| Insula <sup>LR</sup>            | 330  | 345   | 289   | 331    |
| Cingulum_Ant                    | 650  | 774** | 765   | 894**  |
| Cingulum_Mid                    | 958  | 790** | 1214  | 1022** |
| Cingulum_Post                   | 507  | 547*  | 590   | 618    |
| Hippocampus <sup>R</sup>        | 279  | 282   | 331   | 318    |
| ParaHippocampal <sup>LR</sup>   | 256  | 211** | 263   | 236*   |
| Amygdala <sup>LR</sup>          | 295  | 262** | 336   | 296**  |
| Calcarine                       | 374  | 383   | 428   | 436    |
| Cuneus <sup>R</sup>             | 487  | 508   | 517   | 548    |
| Lingual                         | 289  | 285   | 297   | 286*   |
| Occipital_Sup                   | 523  | 540   | 495   | 525    |
| Occipital_Mid <sup>LR</sup>     | 324  | 370** | 317   | 346    |
| Occipital_Inf <sup>R</sup>      | 242  | 256   | 278   | 263*   |
| Fusiform <sup>TR</sup>          | 290  | 236** | 348   | 294**  |
| Postcentral <sup>LR</sup>       | 548  | 446** | 659   | 590**  |
| Parietal_Sup                    | 529  | 441** | 540   | 489**  |
| Parietal_Inf <sup>LR</sup>      | 519  | 438** | 538   | 514    |
| SupraMarginal <sup>LR</sup>     | 640  | 612   | 573   | 527*   |
| Angular <sup>LR</sup>           | 411  | 397   | 521   | 505    |
| Precuneus <sup>R</sup>          | 619  | 615   | 698   | 671    |
| Paracentral_Lobule <sup>R</sup> | 928  | 727** | 828   | 707**  |
| Caudate <sup>LR</sup>           | 348  | 287** | 380   | 309**  |
| Putamen <sup>LR</sup>           | 555  | 541   | 490   | 484*   |
| Pallidum <sup>LR</sup>          | 465  | 474   | 471   | 481    |
| Thalamus <sup>LR</sup>          | 534  | 499*  | 517   | 462**  |
| Heschl                          | 194  | 207   | 181   | 215**  |
| Temporal_Sup <sup>LR</sup>      | 351  | 358   | 298   | 315    |
| Temporal_Pole_Sup               | 287  | 297   | 260   | 286    |
| Temporal_Mid <sup>LR</sup>      | 358  | 360   | 374   | 366*   |
| Temporal_Pole_Mid <sup>LR</sup> | 279  | 276   | 304   | 313    |
| Temporal_Inf <sup>LR</sup>      | 355  | 306** | 348   | 285**  |

\*significant change over time ( $P < 0.05$ )

\*\*significant change over time ( $P < 0.05/90$ )

<sup>L/R</sup>Significant effect of sex for left (L) and/or right (R) region: boys > girls in all cases.

**Supporting Information Table III. Broad heritability of streamline count based local efficiency at measurement 1 and 2, and the broad heritability of change in local efficiency.**

| Region             | <u>Left</u> |             | <u>Right</u> |             | <u>Left</u> | <u>Right</u> |
|--------------------|-------------|-------------|--------------|-------------|-------------|--------------|
|                    | M 1         | M 2         | M 1          | M 2         | Change      | Change       |
| Precentral         | 0.25        | <b>0.36</b> | <b>0.33</b>  | <b>0.46</b> | 0.15        | 0.11         |
| Frontal_Sup        | 0.27        | <b>0.35</b> | <b>0.34</b>  | <b>0.31</b> | 0.28        | 0.11         |
| Frontal_Sup_Orb    | 0.31        | <b>0.47</b> | <b>0.40</b>  | <b>0.35</b> | <b>0.46</b> | <b>0.45</b>  |
| Frontal_Mid        | <b>0.56</b> | 0.02        | 0.24         | 0.01        | <b>0.24</b> | 0.15         |
| Frontal_Mid_Orb    | 0.18        | 0.34        | 0.09         | <b>0.40</b> | 0.15        | <b>0.27</b>  |
| Frontal_Inf_Oper   | 0.30        | 0.24        | 0.12         | 0.00        | 0.28        | 0.13         |
| Frontal_Inf_Tri    | 0.25        | 0.24        | 0.01         | 0.11        | 0.00        | 0.07         |
| Frontal_Inf_Orb    | 0.07        | 0.00        | 0.18         | 0.11        | 0.04        | 0.04         |
| Rolandic_Oper      | <b>0.34</b> | <b>0.24</b> | <b>0.44</b>  | 0.26        | 0.02        | <b>0.40</b>  |
| Supp_Motor_Area    | 0.20        | 0.19        | <b>0.43</b>  | <b>0.29</b> | <b>0.30</b> | 0.20         |
| Olfactory          | <b>0.39</b> | <b>0.43</b> | <b>0.37</b>  | 0.19        | 0.18        | 0.33         |
| Frontal_Sup_Medial | 0.21        | <b>0.48</b> | <b>0.31</b>  | 0.24        | 0.22        | 0.24         |
| Frontal_Med_Orb    | 0.13        | <b>0.39</b> | <b>0.40</b>  | <b>0.64</b> | 0.26        | 0.19         |
| Rectus             | <b>0.44</b> | <b>0.30</b> | 0.09         | 0.24        | 0.16        | 0.04         |
| Insula             | 0.21        | 0.02        | 0.24         | <b>0.31</b> | 0.06        | 0.26         |
| Cingulum_Ant       | <b>0.49</b> | <b>0.48</b> | <b>0.32</b>  | <b>0.54</b> | <b>0.54</b> | <b>0.32</b>  |
| Cingulum_Mid       | <b>0.47</b> | <b>0.42</b> | <b>0.41</b>  | <b>0.29</b> | <b>0.32</b> | <b>0.39</b>  |
| Cingulum_Post      | <b>0.43</b> | <b>0.34</b> | <b>0.55</b>  | <b>0.37</b> | 0.09        | 0.22         |
| Hippocampus        | <b>0.39</b> | <b>0.27</b> | <b>0.50</b>  | <b>0.21</b> | 0.01        | 0.18         |
| ParaHippocampal    | <b>0.33</b> | 0.08        | <b>0.33</b>  | 0.10        | 0.10        | 0.09         |
| Amygdala           | <b>0.53</b> | <b>0.29</b> | 0.15         | 0.00        | 0.06        | 0.09         |
| Calcarine          | <b>0.36</b> | <b>0.37</b> | <b>0.64</b>  | <b>0.36</b> | 0.11        | 0.18         |
| Cuneus             | <b>0.45</b> | 0.16        | <b>0.42</b>  | <b>0.22</b> | 0.16        | 0.02         |
| Lingual            | <b>0.43</b> | <b>0.58</b> | <b>0.43</b>  | 0.26        | 0.20        | 0.32         |
| Occipital_Sup      | <b>0.46</b> | <b>0.33</b> | <b>0.39</b>  | <b>0.27</b> | 0.14        | 0.01         |
| Occipital_Mid      | <b>0.29</b> | <b>0.46</b> | <b>0.31</b>  | <b>0.24</b> | 0.28        | 0.00         |
| Occipital_Inf      | <b>0.38</b> | <b>0.24</b> | <b>0.56</b>  | <b>0.36</b> | 0.02        | 0.31         |
| Fusiform           | <b>0.60</b> | 0.13        | <b>0.30</b>  | <b>0.25</b> | <b>0.20</b> | 0.02         |
| Postcentral        | <b>0.61</b> | <b>0.18</b> | <b>0.46</b>  | 0.15        | <b>0.27</b> | 0.28         |
| Parietal_Sup       | <b>0.56</b> | <b>0.41</b> | <b>0.35</b>  | 0.22        | 0.26        | 0.17         |
| Parietal_Inf       | <b>0.51</b> | 0.10        | <b>0.45</b>  | <b>0.33</b> | <b>0.54</b> | 0.04         |
| SupraMarginal      | <b>0.54</b> | <b>0.39</b> | <b>0.41</b>  | <b>0.24</b> | 0.22        | 0.06         |
| Angular            | <b>0.24</b> | 0.14        | <b>0.31</b>  | 0.16        | 0.02        | 0.05         |
| Precuneus          | <b>0.41</b> | <b>0.34</b> | <b>0.39</b>  | <b>0.31</b> | 0.01        | 0.01         |
| Paracentral_Lobule | <b>0.27</b> | <b>0.39</b> | <b>0.35</b>  | 0.22        | <b>0.33</b> | <b>0.43</b>  |
| Caudate            | <b>0.45</b> | 0.20        | 0.22         | 0.00        | 0.26        | 0.17         |
| Putamen            | <b>0.40</b> | <b>0.18</b> | <b>0.53</b>  | <b>0.21</b> | 0.03        | 0.17         |
| Pallidum           | <b>0.40</b> | <b>0.26</b> | <b>0.42</b>  | <b>0.26</b> | 0.05        | 0.09         |
| Thalamus           | <b>0.51</b> | <b>0.41</b> | 0.32         | 0.02        | 0.07        | 0.24         |
| Heschl             | 0.02        | 0.07        | 0.12         | 0.24        | 0.07        | 0.12         |
| Temporal_Sup       | 0.11        | <b>0.39</b> | 0.24         | 0.32        | <b>0.48</b> | 0.33         |
| Temporal_Pole_Sup  | 0.17        | 0.01        | 0.34         | 0.00        | 0.09        | 0.30         |
| Temporal_Mid       | 0.25        | 0.22        | 0.21         | <b>0.37</b> | 0.14        | 0.08         |
| Temporal_Pole_Mid  | 0.31        | 0.06        | 0.31         | 0.06        | 0.05        | 0.08         |
| Temporal_Inf       | <b>0.45</b> | 0.05        | <b>0.53</b>  | <b>0.22</b> | 0.18        | 0.13         |

Bold: significant broad heritability ( $P < 0.05$ )

**Supporting Information Table IV. Significant phenotypic correlations (Rph) between change in streamline-based local efficiency and change in IQ.**

| <u>Region</u>     | <u>Rph</u> |
|-------------------|------------|
| Frontal_Inf_Orb_R | -0.21      |
| Frontal_Med_Orb_R | -0.18      |
| Rectus_R          | -0.16      |
| Cingulum_Ant_L    | -0.17      |
| Cingulum_Ant_R    | -0.18      |
| Cingulum_Post_R   | -0.15      |
| Calcarine_R       | -0.18      |
| Occipital_Mid_L   | -0.19      |
| Occipital_Inf_L   | -0.17      |
| SupraMarginal_R   | -0.16      |
| Caudate_L         | -0.19      |

Significance at  $P < 0.05$
